# Supplementary material for: STI in times of PrEP: high prevalence of chlamydia, gonorrhea, and mycoplasma at different anatomic sites in men who have sex with men in Germany
Source: BMC Infect Dis. 2020 Feb 7;20:110. doi: 10.1186/s12879-020-4831-4 (PMC7007644; doi:10.1186/s12879-020-4831-4)
Supplement: Supplementary file 1 — Additional file 1. Questionnaire MSM Screening Study [file 12879_2020_4831_MOESM1_ESM.pdf]

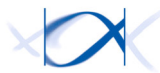

## Questionnaire MSM Screening Study

**1. What year were you born?**

**2. Where do you live?**

(first three numbers of your postal code)

**3. Were you born in Germany?**

☐ Yes ☐ No. Country of origin: \_\_\_\_\_

**4. What is your highest school degree?**

- ☐ I am still in school  
☐ I haven't graduated high school  
☐ 9th grade  
☐ 10th grade  
☐ High school diploma

**5. What kind of relationship do you currently have?**

- ☐ I have a monogamous relationship  
☐ I have an open relationship with an agreement for sex with others  
☐ I have an open relationship without an agreement for sex with others  
☐ I am single/I don't have a relationship  
☐ Other kind of relationship  
☐ I don't know

**6. How many sex partners did you have in the last 6 months?**

- \_\_\_ men  
 \_\_\_ women  
☐ I don't know  
☐ I didn't have sex

**7. What kind of relationship did you have with your sex partners in the last 6 months?**

(More than one answer possible, if you had multiple sex partners)

- ☐ Only steady sex partners  
☐ Only non-steady sex partners  
☐ Both, steady and non-steady sex partners  
☐ I don't know

**8. Where did you meet your sex partners in the last 6 months?**

(More than one answer possible, if you had multiple sex partners)

- ☐ Internet  
☐ Pub, bar, nightclub  
☐ Sauna

- ☐ Sex party  
☐ Porn cinema  
☐ Park/ cruising location  
☐ Through friends  
☐ Classified advertising  
☐ Brothel  
☐ Street  
☐ Street prostitution  
☐ Other places  
☐ I don't know

**9. Did you have anal/vaginal sex without a condom in the last 6 months**

☐ Yes ☐ No ☐ I don't know

**9.1. If yes, with how many sex partners did you have sex without a condom in the last 6 months?**

- \_\_\_ men  
 \_\_\_ women  
☐ I don't know

**10. In the last 6 months, what kind of sex did you have with your sex partners?**

(more than one answer possible)

- ☐ Anal sex with condom  
☐ active ☐ passive  
☐ Anal sex without condom  
☐ active ☐ passive  
☐ Oral sex with condom  
☐ active ☐ passive  
☐ Oral sex without condom  
☐ active ☐ passive  
☐ Rimming (ass licking)  
☐ active ☐ passive  
☐ Fisting (put the fist in the others ass)  
☐ active ☐ passive  
☐ others \_\_\_\_\_  
☐ I don't know

**11. Did any of your sex partners use saliva as lubricant before inserting his finger, penis or other objects into your bottom?**

☐ Yes ☐ No ☐ I don't know

**12. In the last 6 months, did you use alcohol or drugs before or while having sex?**

☐ Yes ☐ No ☐ I don't know

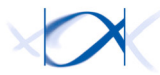**12.1. If yes, what kind of?**

(More than one answer possible)

- ☐ Alcohol
- ☐ Cannabis
- ☐ Viagra/Cialis
- ☐ Poppers
- ☐ Cocaine
- ☐ Ecstasy
- ☐ Speed
- ☐ Crystal Meth
- ☐ GHB/GBL
- ☐ Bath salts/ Spice
- ☐ Others
- ☐ I don't know

**13. If you have anal/vaginal sex without a condom: Do you use other strategies to reduce the risk of a HIV infection?**

(More than one answer possible)

- ☐ I don't have sex without a condom.
- ☐ I only have sex without a condom in monogamous relationships.
- ☐ I only have sex without a condom if I am the active partner.
- ☐ I only have sex without a condom if I am the passive partner.
- ☐ I tell my sex partner not to ejaculate inside my bottom.
- ☐ I try to assess if my sex partner is HIV positive.
- ☐ I ask my sex partner for his HIV status
- ☐ If my sex partner is HIV positive, I only have sex with him/her if he/she has an undetectable viral load.
- ☐ I only have sex without a condom with healthy looking men.
- ☐ I use PrEP (pre-exposure prophylaxis)
- ☐ My sex partner uses PrEP (pre-exposure prophylaxis)
- ☐ I think my HIV risk is low because I'm circumcised.
- ☐ I use other strategies.
- ☐ No, I don't use other strategies.
- ☐ I don't know

**14. In the last 6 months, did you have non-steady sex partners...****14.1. who you paid to have sex with you?**

- ☐ Yes ☐ No

**14.2. who paid you to have sex with them?**

- ☐ Yes ☐ No

**15. Have you ever been tested for one of the following infections?**

(More than one answer possible)?

- ☐ HIV
- ☐ Syphilis
- ☐ Hepatitis B
- ☐ Hepatitis C
- ☐ Chlamydia/ LGV
- ☐ Gonorrhoea
- ☐ Mycoplasma
- ☐ Trichomonas
- ☐ I don't know
- ☐ No

**16. Have you ever been diagnosed with one of the following infections?**

(More than one answer possible)

- ☐ HIV
- ☐ Syphilis
- ☐ Hepatitis B
- ☐ Hepatitis C
- ☐ Chlamydia/LGV
- ☐ Gonorrhoea
- ☐ Mycoplasma
- ☐ Trichomonas
- ☐ I don't know
- ☐ No

**17. Have you ever been treated for one of the following infections?**

(More than one answer possible)

- ☐ HIV
- ☐ Syphilis
- ☐ Hepatitis B
- ☐ Hepatitis C
- ☐ Chlamydia/LGV
- ☐ Gonorrhoea
- ☐ Mycoplasma
- ☐ Trichomonas
- ☐ I don't know
- ☐ No

**18. In the last 4 weeks, did you have one or more than one of the following physical symptoms?**

- pain when urinating
- Itching/pain of the penis, bottom or throat
- skin lesions at penis, bottom or throat
- penile or anal discharge

- ☐ Yes
- ☐ No
- ☐ I don't know

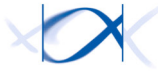

**19. If you are HIV positive:**

**19.1. When were you first diagnosed HIV positive**

- ☐ Within the last 6 months
- ☐ Within the last 12 months
- ☐ More than 12 months ago
- ☐ I don't remember

**19.2. What was your last viral load?**

- ☐ below threshold
- ☐ <1,000 copies/ml
- ☐ 1,000 – 10,000 copies/ml
- ☐ 10,000 – 100,000 copies/ml
- ☐ >100,000 copies/ml
- ☐ I don't know

**19.3. Do you take any HIV medication (HIV combination therapy)?**

- ☐ Yes ☐ No ☐ I don't know

**20. If you are HIV negative: Do you currently take PrEP (pre-exposure prophylaxis) against HIV?**

- ☐ Yes ☐ No ☐ I don't know

**Thank you for taking part!**
